# Supplementary material
Source: PubMed Central journal article supplement (PMC4787712)
Supplement: bonl767186.wt1_default.pdf [file bonl767186.wt1_default.pdf]

**Webtable 1**

Annual recurrence risks estimated from multivariate model at specific time points post first seizure.

| Variable                |                                     |                            |             |                     | Months from 1 <sup>st</sup> seizure | Immediate Treatment                            |                                                                       | Delayed Treatment                              |                                                                       |
|-------------------------|-------------------------------------|----------------------------|-------------|---------------------|-------------------------------------|------------------------------------------------|-----------------------------------------------------------------------|------------------------------------------------|-----------------------------------------------------------------------|
| Aetiology               | First Degree Relative with Epilepsy | Seizures Only While Asleep | EEG Results | CT/MRI Scan Results |                                     | Risk of seizure within next 12-months (95% CI) | Months from 1 <sup>st</sup> seizure until annual risk falls below 20% | Risk of seizure within next 12-months (95% CI) | Months from 1 <sup>st</sup> seizure until annual risk falls below 20% |
| Cryptogenic/ Idiopathic | No                                  | No                         | Normal      | Normal              | 6<br>12                             | 13 (10 to 16)<br>7 (5 to 10)                   | 1.2                                                                   | 16 (12 to 19)<br>9 (6 to 12)                   | 3.2                                                                   |
| Cryptogenic/ Idiopathic | No                                  | No                         | Normal      | Abnormal            | 6<br>12                             | 14 (11 to 17)<br>8 (5 to 11)                   | 2.1                                                                   | 17 (14 to 20)<br>10 (7 to 12)                  | 3.6                                                                   |
| Cryptogenic/ Idiopathic | No                                  | No                         | Normal      | Not Done            | 6<br>12                             | 17 (13 to 20)<br>9 (7 to 12)                   | 3.5                                                                   | 20 (17 to 23)<br>11 (9 to 14)                  | 5.7                                                                   |
| Cryptogenic/ Idiopathic | No                                  | No                         | Abnormal    | Normal              | 6<br>12                             | 20 (16 to 23)<br>11 (9 to 14)                  | 5.5                                                                   | 23 (20 to 26)<br>13 (11 to 16)                 | 7.0                                                                   |
| Cryptogenic/ Idiopathic | No                                  | No                         | Abnormal    | Abnormal            | 6<br>12                             | 21 (18 to 24)<br>12 (9 to 15)                  | 6.1                                                                   | 25 (22 to 28)<br>14 (12 to 17)                 | 8.1                                                                   |
| Cryptogenic/ Idiopathic | No                                  | No                         | Abnormal    | Not Done            | 6<br>12                             | 24 (22 to 27)<br>14 (12 to 17)                 | 7.8                                                                   | 29 (26 to 32)<br>17 (15 to 20)                 | 10.0                                                                  |
| Cryptogenic/ Idiopathic | No                                  | No                         | Not Done    | Normal              | 6<br>12                             | 17 (13 to 20)<br>9 (7 to 12)                   | 3.5                                                                   | 20 (17 to 23)<br>11 (9 to 14)                  | 5.7                                                                   |
| Cryptogenic/ Idiopathic | No                                  | No                         | Not Done    | Abnormal            | 6<br>12                             | 18 (15 to 21)<br>10 (7 to 13)                  | 4.0                                                                   | 21 (18 to 24)<br>12 (10 to 15)                 | 6.2                                                                   |
| Cryptogenic/ Idiopathic | No                                  | No                         | Not Done    | Not Done            | 6<br>12                             | 21 (18 to 24)<br>12 (9 to 15)                  | 6.1                                                                   | 25 (22 to 28)<br>14 (12 to 17)                 | 8.1                                                                   |
| Cryptogenic/ Idiopathic | No                                  | Yes                        | Normal      | Normal              | 6<br>12                             | 19 (15 to 22)<br>11 (8 to 13)                  | 4.8                                                                   | 22 (19 to 25)<br>13 (10 to 15)                 | 6.8                                                                   |
| Cryptogenic/ Idiopathic | No                                  | Yes                        | Normal      | Abnormal            | 6<br>12                             | 20 (19 to 23)<br>11 (9 to 14)                  | 5.7                                                                   | 24 (21 to 27)<br>14 (11 to 16)                 | 7.6                                                                   |
| Cryptogenic/ Idiopathic | No                                  | Yes                        | Normal      | Not Done            | 6<br>12                             | 23 (20 to 26)<br>14 (11 to 16)                 | 7.0                                                                   | 28 (25 to 30)<br>16 (14 to 19)                 | 9.8                                                                   |
| Cryptogenic/ Idiopathic | No                                  | Yes                        | Abnormal    | Normal              | 6<br>12                             | 27 (25 to 30)<br>16 (14 to 19)                 | 9.2                                                                   | 32 (30 to 35)<br>19 (17 to 22)                 | 11.8                                                                  |
| Cryptogenic/ Idiopathic | No                                  | Yes                        | Abnormal    | Abnormal            | 6<br>12                             | 29 (26 to 32)<br>17 (15 to 20)                 | 10.0                                                                  | 34 (32 to 37)<br>21 (18 to 23)                 | 16.3                                                                  |
| Cryptogenic/ Idiopathic | No                                  | Yes                        | Abnormal    | Not Done            | 6<br>12                             | 34 (31 to 36)<br>20 (18 to 23)                 | 12.5                                                                  | 39 (37 to 42)<br>24 (22 to 26)                 | 24.4                                                                  |
| Cryptogenic/ Idiopathic | No                                  | Yes                        | Not Done    | Normal              | 6<br>12                             | 23 (20 to 26)<br>14 (11 to 16)                 | 7.0                                                                   | 28 (25 to 30)<br>16 (14 to 19)                 | 9.8                                                                   |
| Cryptogenic/ Idiopathic | No                                  | Yes                        | Not Done    | Abnormal            | 6<br>12                             | 25 (22 to 28)<br>15 (12 to 17)                 | 8.2                                                                   | 29 (27 to 32)<br>17 (15 to 20)                 | 10.5                                                                  |
| Cryptogenic/ Idiopathic | No                                  | Yes                        | Not Done    | Not Done            | 6<br>12                             | 29 (26 to 32)<br>17 (15 to 20)                 | 10.0                                                                  | 34 (32 to 37)<br>20 (18 to 23)                 | 16.3                                                                  |
| Cryptogenic/ Idiopathic | Yes                                 | No                         | Normal      | Normal              | 6<br>12                             | 17 (14 to 20)<br>10 (7 to 12)                  | 3.6                                                                   | 20 (17 to 23)<br>12 (9 to 14)                  | 6.0                                                                   |
| Cryptogenic/ Idiopathic | Yes                                 | No                         | Normal      | Abnormal            | 6<br>12                             | 18 (15 to 21)<br>10 (8 to 13)                  | 4.8                                                                   | 22 (19 to 25)<br>13 (10 to 15)                 | 6.5                                                                   |
| Cryptogenic/ Idiopathic | Yes                                 | No                         | Normal      | Not Done            | 6<br>12                             | 21 (18 to 24)<br>12 (10 to 15)                 | 6.3                                                                   | 25 (23 to 28)<br>15 (12 to 17)                 | 8.7                                                                   |
| Cryptogenic/ Idiopathic | Yes                                 | No                         | Abnormal    | Normal              | 6<br>12                             | 25 (22 to 28)<br>15 (12 to 17)                 | 8.7                                                                   | 30 (27 to 32)<br>18 (15 to 20)                 | 10.7                                                                  |
| Cryptogenic/ Idiopathic | Yes                                 | No                         | Abnormal    | Abnormal            | 6<br>12                             | 27 (24 to 30)<br>16 (13 to 18)                 | 9.2                                                                   | 32 (29 to 34)<br>19 (16 to 21)                 | 11.3                                                                  |
| Cryptogenic/ Idiopathic | Yes                                 | No                         | Abnormal    | Not Done            | 6<br>12                             | 31 (29 to 34)<br>19 (16 to 21)                 | 11.3                                                                  | 37 (34 to 39)<br>22 (20 to 24)                 | 23.6                                                                  |
| Cryptogenic/ Idiopathic | Yes                                 | No                         | Not Done    | Normal              | 6<br>12                             | 21 (18 to 24)<br>12 (10 to 15)                 | 6.3                                                                   | 25 (23 to 28)<br>15 (12 to 17)                 | 8.7                                                                   |
| Cryptogenic/ Idiopathic | Yes                                 | No                         | Not Done    | Abnormal            | 6<br>12                             | 23 (20 to 26)<br>13 (11 to 16)                 | 7.0                                                                   | 27 (24 to 30)<br>16 (13 to 18)                 | 9.2                                                                   |
| Cryptogenic/ Idiopathic | Yes                                 | No                         | Not Done    | Not Done            | 6<br>12                             | 27 (24 to 30)<br>16 (13 to 18)                 | 9.2                                                                   | 32 (29 to 34)<br>19 (16 to 21)                 | 11.3                                                                  |
| Cryptogenic/ Idiopathic | Yes                                 | Yes                        | Normal      | Normal              | 6<br>12                             | 24 (21 to 27)<br>14 (11 to 17)                 | 7.7                                                                   | 28 (26 to 31)<br>17 (14 to 19)                 | 10.0                                                                  |
| Cryptogenic/ Idiopathic | Yes                                 | Yes                        | Normal      | Abnormal            | 6<br>12                             | 26 (23 to 28)<br>15 (12 to 17)                 | 8.8                                                                   | 30 (28 to 33)<br>18 (15 to 20)                 | 10.8                                                                  |
| Cryptogenic/ Idiopathic | Yes                                 | Yes                        | Normal      | Not Done            | 6<br>12                             | 30 (27 to 33)                                  | 10.7                                                                  | 35 (33 to 38)                                  | 23.4                                                                  |

|                            |     |     |          |          |         |                                |      |                                |      |
|----------------------------|-----|-----|----------|----------|---------|--------------------------------|------|--------------------------------|------|
| Idiopathic                 |     |     |          |          | 12      | 18 (15 to 20)                  |      | 21 (19 to 23)                  |      |
| Cryptogenic/<br>Idiopathic | Yes | Yes | Abnormal | Normal   | 6<br>12 | 35 (32 to 37)<br>21 (18 to 23) | 16.3 | 40 (38 to 43)<br>25 (22 to 27) | 24.6 |
| Cryptogenic/<br>Idiopathic | Yes | Yes | Abnormal | Abnormal | 6<br>12 | 37 (34 to 39)<br>22 (20 to 25) | 23.6 | 43 (41 to 45)<br>26 (24 to 29) | 25.1 |
| Cryptogenic/<br>Idiopathic | Yes | Yes | Abnormal | Not Done | 6<br>12 | 42 (40 to 45)<br>26 (24 to 28) | 25.1 | 49 (47 to 51)<br>31 (29 to 33) | 27.0 |
| Cryptogenic/<br>Idiopathic | Yes | Yes | Not Done | Normal   | 6<br>12 | 30 (27 to 32)<br>18 (15 to 20) | 10.7 | 35 (33 to 37)<br>21 (19 to 23) | 23.4 |
| Cryptogenic/<br>Idiopathic | Yes | Yes | Not Done | Abnormal | 6<br>12 | 32 (29 to 34)<br>19 (16 to 21) | 11.3 | 37 (35 to 40)<br>22 (20 to 25) | 24.1 |
| Cryptogenic/<br>Idiopathic | Yes | Yes | Not Done | Not Done | 6<br>12 | 37 (34 to 39)<br>22 (20 to 25) | 23.6 | 43 (41 to 45)<br>26 (24 to 29) | 25.1 |
| Symptomatic                | No  | No  | Normal   | Normal   | 6<br>12 | 17 (14 to 20)<br>10 (7 to 12)  | 3.6  | 20 (17 to 23)<br>12 (9 to 14)  | 6.0  |
| Symptomatic                | No  | No  | Normal   | Abnormal | 6<br>12 | 18 (15 to 21)<br>10 (8 to 13)  | 4.8  | 22 (19 to 25)<br>13 (10 to 15) | 6.5  |
| Symptomatic                | No  | No  | Normal   | Not Done | 6<br>12 | 21 (18 to 24)<br>12 (10 to 15) | 6.3  | 25 (23 to 28)<br>15 (12 to 17) | 8.7  |
| Symptomatic                | No  | No  | Abnormal | Normal   | 6<br>12 | 25 (22 to 28)<br>15 (12 to 17) | 8.7  | 30 (27 to 32)<br>18 (15 to 20) | 10.7 |
| Symptomatic                | No  | No  | Abnormal | Abnormal | 6<br>12 | 27 (24 to 40)<br>16 (13 to 18) | 9.2  | 32 (29 to 34)<br>19 (16 to 21) | 11.3 |
| Symptomatic                | No  | No  | Abnormal | Not Done | 6<br>12 | 31 (29 to 34)<br>19 (16 to 21) | 11.3 | 37 (34 to 39)<br>22 (20 to 24) | 23.6 |
| Symptomatic                | No  | No  | Not Done | Normal   | 6<br>12 | 21 (18 to 24)<br>12 (10 to 15) | 6.3  | 25 (23 to 28)<br>15 (12 to 17) | 8.7  |
| Symptomatic                | No  | No  | Not Done | Abnormal | 6<br>12 | 23 (20 to 26)<br>13 (11 to 16) | 7.0  | 27 (24 to 30)<br>16 (13 to 18) | 9.2  |
| Symptomatic                | No  | No  | Not Done | Not Done | 6<br>12 | 27 (24 to 30)<br>16 (13 to 18) | 9.2  | 32 (29 to 34)<br>19 (16 to 21) | 11.3 |
| Symptomatic                | No  | Yes | Normal   | Normal   | 6<br>12 | 24 (21 to 27)<br>14 (11 to 17) | 7.7  | 28 (26 to 31)<br>17 (14 to 19) | 10.0 |
| Symptomatic                | No  | Yes | Normal   | Abnormal | 6<br>12 | 26 (23 to 28)<br>15 (12 to 17) | 8.8  | 30 (28 to 33)<br>18 (15 to 20) | 10.8 |
| Symptomatic                | No  | Yes | Normal   | Not Done | 6<br>12 | 30 (27 to 33)<br>18 (15 to 20) | 10.7 | 35 (33 to 38)<br>21 (19 to 23) | 23.4 |
| Symptomatic                | No  | Yes | Abnormal | Normal   | 6<br>12 | 35 (32 to 37)<br>21 (18 to 23) | 16.3 | 40 (38 to 43)<br>25 (22 to 27) | 24.6 |
| Symptomatic                | No  | Yes | Abnormal | Abnormal | 6<br>12 | 37 (34 to 39)<br>22 (20 to 25) | 23.6 | 43 (41 to 45)<br>26 (24 to 29) | 25.1 |
| Symptomatic                | No  | Yes | Abnormal | Not Done | 6<br>12 | 42 (40 to 45)<br>26 (24 to 28) | 25.1 | 49 (47 to 51)<br>31 (29 to 33) | 27.0 |
| Symptomatic                | No  | Yes | Not Done | Normal   | 6<br>12 | 30 (27 to 32)<br>18 (15 to 20) | 11.7 | 35 (33 to 37)<br>21 (19 to 23) | 23.4 |
| Symptomatic                | No  | Yes | Not Done | Abnormal | 6<br>12 | 32 (29 to 34)<br>19 (16 to 21) | 11.3 | 37 (35 to 40)<br>22 (20 to 25) | 24.1 |
| Symptomatic                | No  | Yes | Not Done | Not Done | 6<br>12 | 37 (34 to 39)<br>22 (20 to 25) | 23.6 | 43 (41 to 45)<br>26 (24 to 29) | 25.1 |
| Symptomatic                | Yes | No  | Normal   | Normal   | 6<br>12 | 22 (19 to 25)<br>13 (10 to 15) | 6.7  | 26 (23 to 29)<br>15 (13 to 18) | 8.8  |
| Symptomatic                | Yes | No  | Normal   | Abnormal | 6<br>12 | 24 (21 to 26)<br>14 (11 to 16) | 7.6  | 28 (25 to 31)<br>16 (14 to 19) | 9.8  |
| Symptomatic                | Yes | No  | Normal   | Not Done | 6<br>12 | 27 (25 to 30)<br>16 (14 to 19) | 9.8  | 32 (30 to 35)<br>19 (17 to 22) | 12.0 |
| Symptomatic                | Yes | No  | Abnormal | Normal   | 6<br>12 | 32 (29 to 35)<br>19 (17 to 21) | 11.8 | 37 (35 to 40)<br>23 (20 to 25) | 24.1 |
| Symptomatic                | Yes | No  | Abnormal | Abnormal | 6<br>12 | 34 (32 to 37)<br>20 (18 to 23) | 16.3 | 40 (37 to 42)<br>24 (22 to 27) | 24.6 |
| Symptomatic                | Yes | No  | Abnormal | Not Done | 6<br>12 | 39 (37 to 42)<br>24 (22 to 26) | 24.4 | 46 (43 to 48)<br>28 (26 to 30) | 25.6 |
| Symptomatic                | Yes | No  | Not Done | Normal   | 6<br>12 | 27 (25 to 30)<br>16 (14 to 19) | 9.8  | 32 (30 to 35)<br>19 (17 to 22) | 12.0 |
| Symptomatic                | Yes | No  | Not Done | Abnormal | 6<br>12 | 29 (27 to 32)<br>17 (15 to 20) | 10.0 | 34 (32 to 37)<br>21 (18 to 23) | 16.3 |
| Symptomatic                | Yes | No  | Not Done | Not Done | 6<br>12 | 34 (31 to 37)<br>20 (18 to 23) | 16.3 | 40 (37 to 42)<br>24 (22 to 26) | 24.4 |
| Symptomatic                | Yes | Yes | Normal   | Normal   | 6       | 31 (28 to 33)                  | 10.8 | 36 (33 to 38)                  | 23.5 |

|             |     |     |          |          |         |                                |      |                                |      |
|-------------|-----|-----|----------|----------|---------|--------------------------------|------|--------------------------------|------|
|             |     |     |          |          | 12      | 18 (16 to 21)                  |      | 22 (19 to 24)                  |      |
| Symptomatic | Yes | Yes | Normal   | Abnormal | 6<br>12 | 33 (30 to 35)<br>19 (17 to 22) | 12.0 | 38 (36 to 40)<br>23 (21 to 25) | 24.2 |
| Symptomatic | Yes | Yes | Normal   | Not Done | 6<br>12 | 38 (35 to 40)<br>23 (21 to 25) | 24.2 | 44 (42 to 46)<br>27 (25 to 29) | 25.5 |
| Symptomatic | Yes | Yes | Abnormal | Normal   | 6<br>12 | 43 (41 to 45)<br>27 (25 to 29) | 25.5 | 50 (48 to 52)<br>32 (30 to 34) | 27.0 |
| Symptomatic | Yes | Yes | Abnormal | Abnormal | 6<br>12 | 46 (44 to 48)<br>29 (26 to 31) | 25.6 | 52 (51 to 54)<br>34 (32 to 35) | 28.8 |
| Symptomatic | Yes | Yes | Abnormal | Not Done | 6<br>12 | 52 (50 to 54)<br>33 (31 to 35) | 27.0 | 59 (57 to 61)<br>39 (37 to 41) | 55.6 |
| Symptomatic | Yes | Yes | Not Done | Normal   | 6<br>12 | 38 (35 to 40)<br>23 (21 to 25) | 24.2 | 44 (42 to 46)<br>27 (25 to 29) | 25.5 |
| Symptomatic | Yes | Yes | Not Done | Abnormal | 6<br>12 | 40 (38 to 42)<br>24 (22 to 27) | 24.6 | 46 (44 to 48)<br>29 (27 to 31) | 25.7 |
| Symptomatic | Yes | Yes | Not Done | Not Done | 6<br>12 | 46 (44 to 48)<br>28 (26 to 31) | 25.6 | 52 (51 to 54)<br>33 (31 to 35) | 28.8 |
